# Supplementary material
Source: publisher figshare collection journal article supplement (https://acs.figshare.com/ndownloader/files/23541025)
Supplement: Supplementary file 1 [file 23541025]

**Supporting Information for**  
**Block Copolymer Electrolytes with Excellent Properties**  
**in a Wide Temperature Range**

Fan Wu, Longfei Luo, Zhehao Tang, Dong Liu, Zhihao Shen,\* and Xing-He Fan\*

Beijing National Laboratory for Molecular Sciences, Key Laboratory of Polymer  
Chemistry and Physics of Ministry of Education, Center for Soft Matter Science and  
Engineering, and College of Chemistry and Molecular Engineering, Peking  
University, Beijing 100871, China

\* To whom correspondence should be addressed. E-mail: fanxh@pku.edu.cn  
(X.-H.F.); zshen@pku.edu.cn (Z.S.)

## 1. Synthesis

*Synthesis of NbTA.* NbTA was synthesized following the route shown in Scheme S1. *cis*-5-Norbornene-*exo*-2,3-dicarboxylic anhydride (1.00 eq, 3.28 g, 20.0 mmol), 2-aminoterephthalic acid (1.00 eq, 3.62 g, 20.0 mmol), and 60 mL of acetic acid were charged into a flask with a stir bar. The mixture was stirred at 120 °C for 12 h. After being cooled to ambient temperature, the mixture was poured into cold water (~150 mL) and vigorously stirred for 2 h. After filtration and drying under an infrared lamp, the product was obtained as a white powder. Yield: 80%. <sup>1</sup>H NMR (400 MHz, DMSO,  $\delta$ , ppm): 13.53 (s, 2H), 7.77–8.11 (m, 3H), 6.37 (s, 2H), 3.19–3.26 (d, 2H), 2.85–2.89 (d, 2H), 1.36–2.02 (m, 2H).

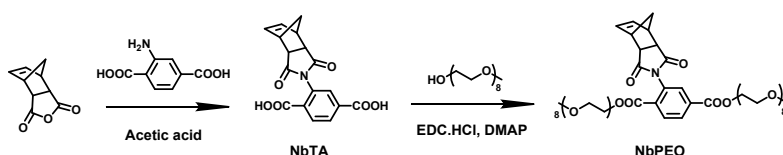

**Scheme S1.** Synthesis of NbPEO

*Synthesis of NbPEO.* NbPEO was synthesized with the procedure shown in Scheme

S1. The above NbTA (1.00 *eq*, 1.64 g, 5.00 mmol), poly(ethylene glycol) methyl ether (PEO,  $M_n = 400$  g/mol, 2.20 *eq*, 4.40 g, 11.0 mmol), 4-dimethylaminopyridine (DMAP, 0.200 *eq*, 0.120 g, 1.00 mmol), and 1-ethyl-3-(3-dimethylaminopropyl)carbodiimide hydrochloride (EDC.HCl, 2.20 *eq*, 2.10 g, 11.0 mmol), and 40 mL of CH<sub>2</sub>Cl<sub>2</sub> were charged into a flask with a stir bar. The mixture was stirred at ambient temperature for 36 h. After the solvent was evaporated by a rotary evaporator, the remaining solution was washed with 20 mL×3 of 1 M HCl and 20 mL×3 of brine. The mixture was dried with sodium sulfate, and the solvent was evaporated. The crude product was purified by silica gel column chromatography with CH<sub>2</sub>Cl<sub>2</sub>/ethanol (v/v = 20/1). Yield: 68%. The chemical structure of NbPEO was confirmed by <sup>1</sup>H NMR (Figure S1).

*Synthesis of RBPOH.* RBPOH was synthesized following the route shown in Scheme S2. 4,4'-Dihydroxybiphenyl (1.20 *eq*, 4.08 g, 24.0 mmol), 1-bromo-2-hexyldecane (1.00 *eq*, 6.10 g, 20.0 mmol), K<sub>2</sub>CO<sub>3</sub> (1.20 *eq*, 3.30 g, 24.0 mmol), and 50 mL of *N,N*-dimethylformamide (DMF) were charged into a flask with a stir bar. The mixture was stirred at 90 °C for 12 h. The floating solid was filtered off, and the solvent was evaporated. The crude product was purified by silica gel column chromatography with CH<sub>2</sub>Cl<sub>2</sub> and the product was obtained as a white powder. Yield: 52%. <sup>1</sup>H NMR (400 MHz, DMSO,  $\delta$ , ppm): 9.43 (s, 1H), 7.44–7.48 (d, 2H), 7.38–7.42 (d, 2H), 6.92–6.97 (d, 2H), 6.78–6.83 (d, 2H), 3.83–3.87 (d, 2H), 1.69–1.77 (m, 1H), 1.18–1.46 (m, 24H), 0.82–0.88 (t, 6H).

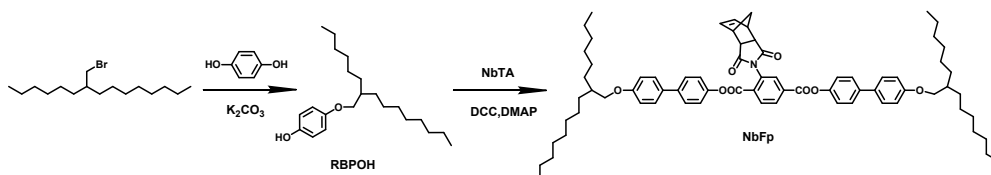

**Scheme S2.** Synthesis of NbFp

*Synthesis of NbFp.* NbFp was synthesized with the procedure shown in Scheme S2. RBPOH (2.00 *eq*, 4.10 g, 10.0 mmol), NbTA (1.00 *eq*, 1.64 g, 5.00 mmol),

*N,N'*-dicyclohexylcarbodiimide (DCC, 2.00 *eq*, 2.06 g, 10.0 mmol), DMAP (0.200 *eq*, 0.120 g, 1.00 mmol), and 50.0 mL of CH<sub>2</sub>Cl<sub>2</sub> were charged into a flask with a stir bar. The mixture was stirred at ambient temperature for 36 h. The floating solid was filtered off, and the solvent was evaporated. The crude product was purified by silica gel column chromatography with CH<sub>2</sub>Cl<sub>2</sub>/petroleum ether (v/v = 1/1), and the product was obtained as a white powder. Yield: 76%. The chemical structure of NbFp was confirmed by <sup>1</sup>H NMR (Figure S2).

*Synthesis of the BCPs.* The synthesis of PNbFp<sub>31</sub>-*b*-PNbPEO<sub>37</sub> is described below as an example. Grubbs' third-generation catalyst (1 equiv, 11.8 mg, 0.0133 mmol) was added into a dry flask. After three pump-purge cycles using high-purity nitrogen, a solution of NbFp (50 equiv, 740 mg, 0.665 mmol) in 2 mL of CH<sub>2</sub>Cl<sub>2</sub> was injected into the flask and the polymerization reaction was initiated. After the mixture was stirred at ambient temperature for 30 min, trace samples were taken out to conduct GPC characterization, and then a solution of NbPEO (60 equiv, 847 mg, 0.800 mmol) in 2 mL of CH<sub>2</sub>Cl<sub>2</sub> was injected into the flask at once. The polymerization was quenched in 2 hours, and the solution was passed through a neutral alumina column to remove the catalyst, and then it was precipitated in 200 mL of petroleum ether to obtain the target polymer as a white solid. Yield: 80%.

## 2. Results

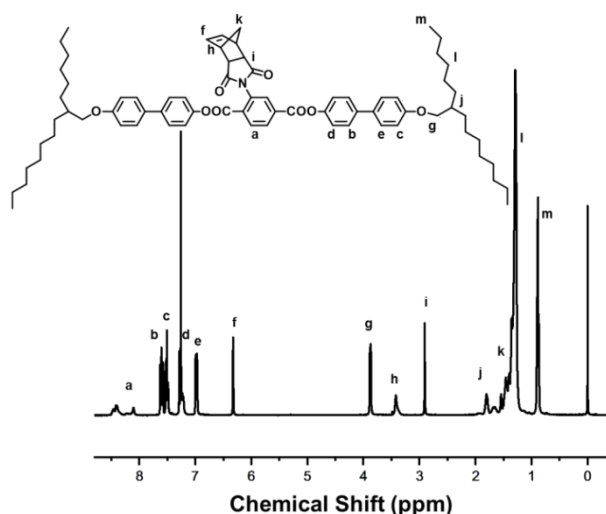

**Figure S1.**  $^1\text{H}$  NMR spectrum of NbPEO in  $\text{CDCl}_3$ .

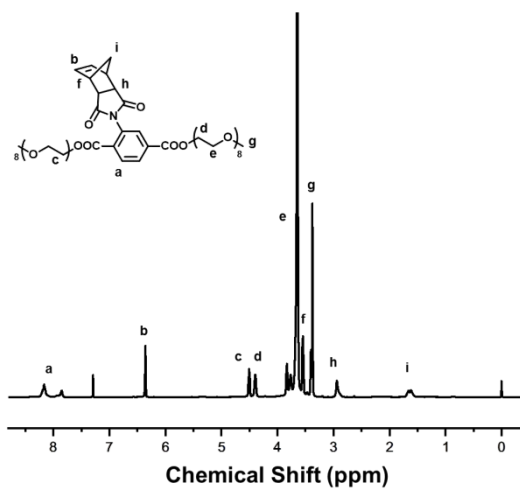

**Figure S2.**  $^1\text{H}$  NMR spectrum of NbFp in  $\text{CDCl}_3$ .

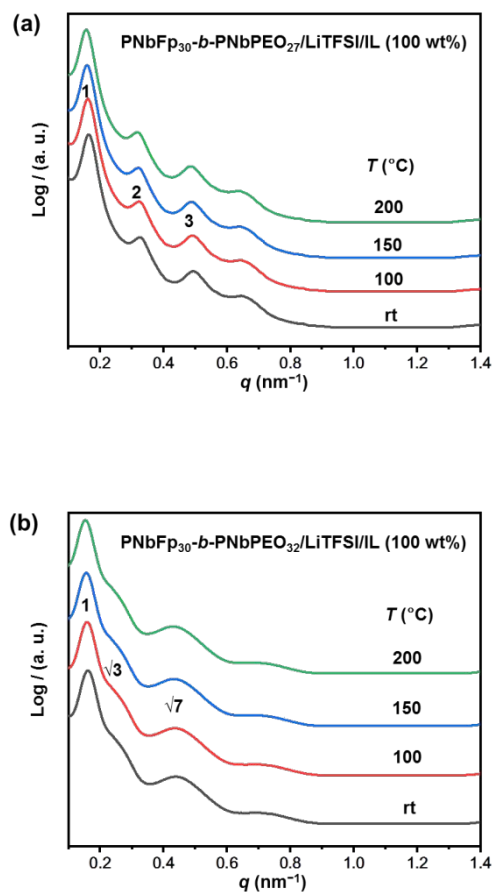

**Figure S3.** SAXS profiles of  $\text{PNbFp}_{30}\text{-}b\text{-PNbPEO}_{27}/\text{LiTFSI/IL}$  (a) and

PNbFp<sub>30</sub>-*b*-PNbPEO<sub>32</sub>/LiTFSI/IL (b) complexes with 100 wt% of IL at different temperatures.

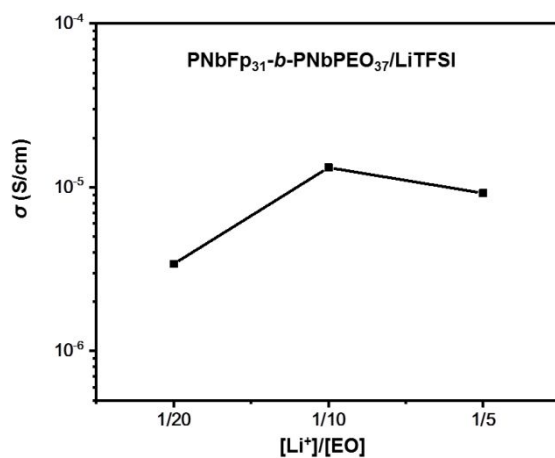

**Figure S4.**  $\sigma$  values of the PNbFp<sub>31</sub>-*b*-PNbPEO<sub>37</sub>/LiTFSI complexes with respect to [Li<sup>+</sup>]/[EO] ratio at ambient temperature.

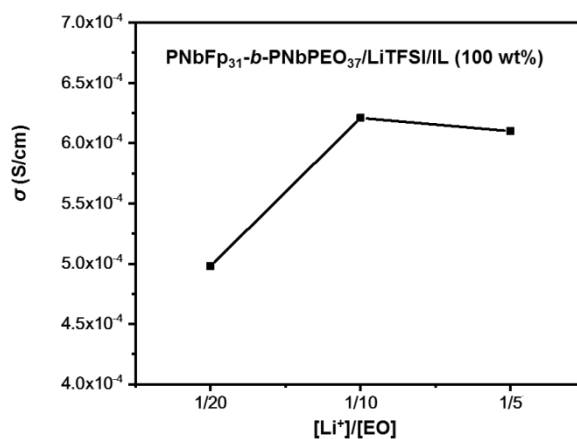

**Figure S5.**  $\sigma$  values of the PNbFp<sub>31</sub>-*b*-PNbPEO<sub>37</sub>/LiTFSI/IL complexes with 100 wt% of IL with respect to [Li<sup>+</sup>]/[EO] ratio at ambient temperature.

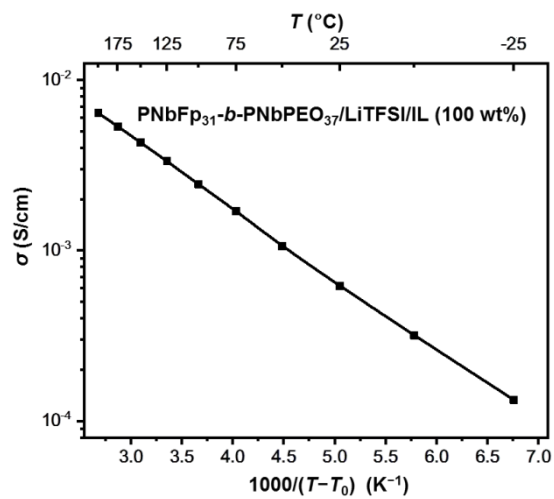

**Figure S6.** VTF fitting of the  $\sigma$  values of the PNBFP<sub>31</sub>-*b*-PNBPEO<sub>37</sub>/LiTFSI/IL complex with 100 wt% of IL.
